# Supplementary material for: A Quantitative System-Scale Characterization of the Metabolism of Clostridium acetobutylicum
Source: PubMed Central journal article supplement — mBio. 2015 Nov 24;6(6):e01808-15. doi: 10.1128/mBio.01808-15 (PMC4669385; doi:10.1128/mbio.01808-15), 2015-11-24
Supplement: mbo006152564sf1.pdf [file mbo006152564sf1.pdf]

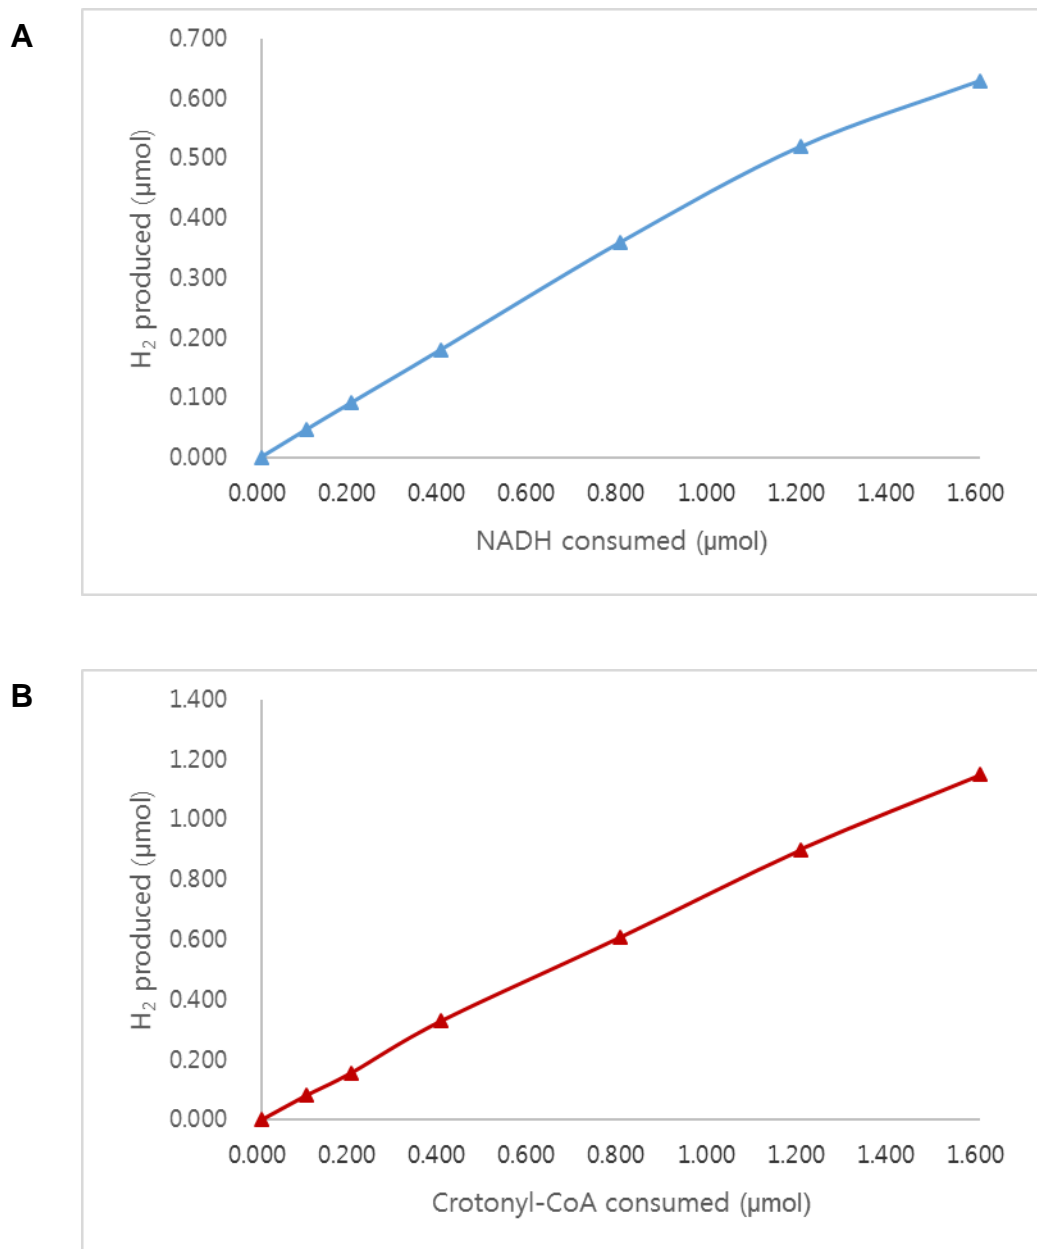

**Fig. S1.**

**H<sub>2</sub> formation from NADH catalyzed by purified butyryl-CoA dehydrogenase/Etf complex from *C. acetobutylicum* in the presence of hydrogenase (HydA from *C. acetobutylicum*), ferredoxin (Fdx from *C. acetobutylicum*), and crotonyl-CoA.**

(A) Amount of H<sub>2</sub> formed as a function of the amount of NADH added in the presence of excess amounts of crotonyl-CoA (B) Amount of H<sub>2</sub> formed as a function of the amount of crotonyl-CoA added in the presence of excess amounts of NADH.
