# Supplementary material for: A Quantitative System-Scale Characterization of the Metabolism of Clostridium acetobutylicum
Source: PubMed Central journal article supplement — mBio. 2015 Nov 24;6(6):e01808-15. doi: 10.1128/mBio.01808-15 (PMC4669385; doi:10.1128/mbio.01808-15), 2015-11-24
Supplement: mbo006152564sf2.pdf [file mbo006152564sf2.pdf]

**A**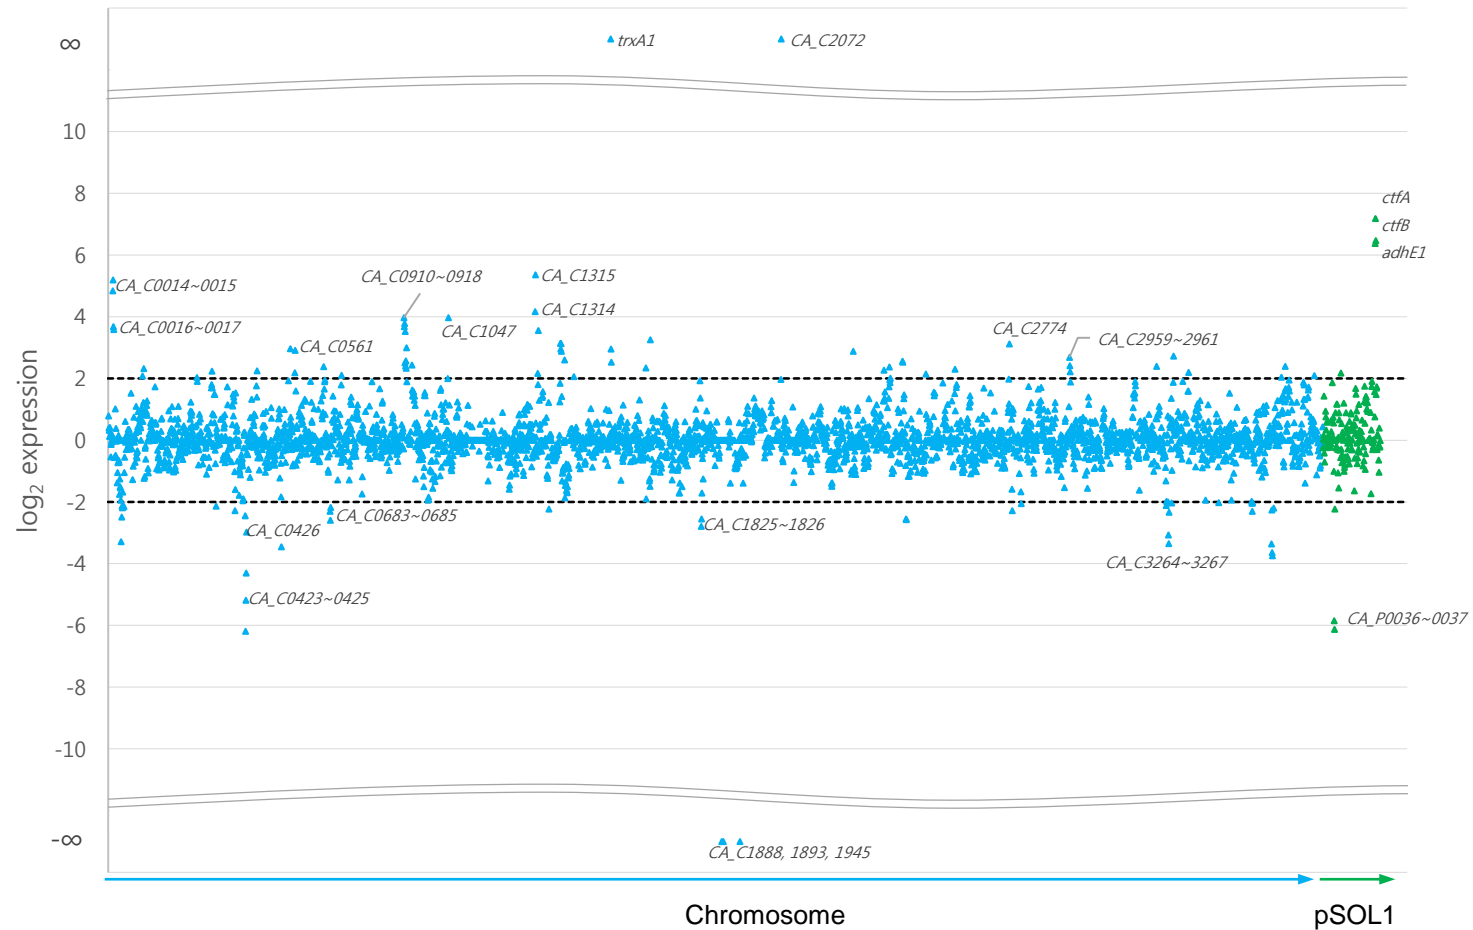

**Fig. S2. Overview of the transcript levels during solventogenesis versus acidogenesis (A) and alcohologenesis versus acidogenesis (B).** Log expression ratios of solventogenesis to acidogenesis (B) and alcohologenesis to acidogenesis are shown. All genes with log values (as logarithms to the basis of 2) higher than 2 ( $\geq 4.0$ -fold increased expression) are significantly induced under solventogenesis (A) and alcohologenesis (B), and genes with a negative log of less than -2 ( $\geq 4.0$ -fold decreased expression) were significantly induced in acidogenesis. According to this definition, all genes between the dashed lines were expected to be not significantly influenced.

**B**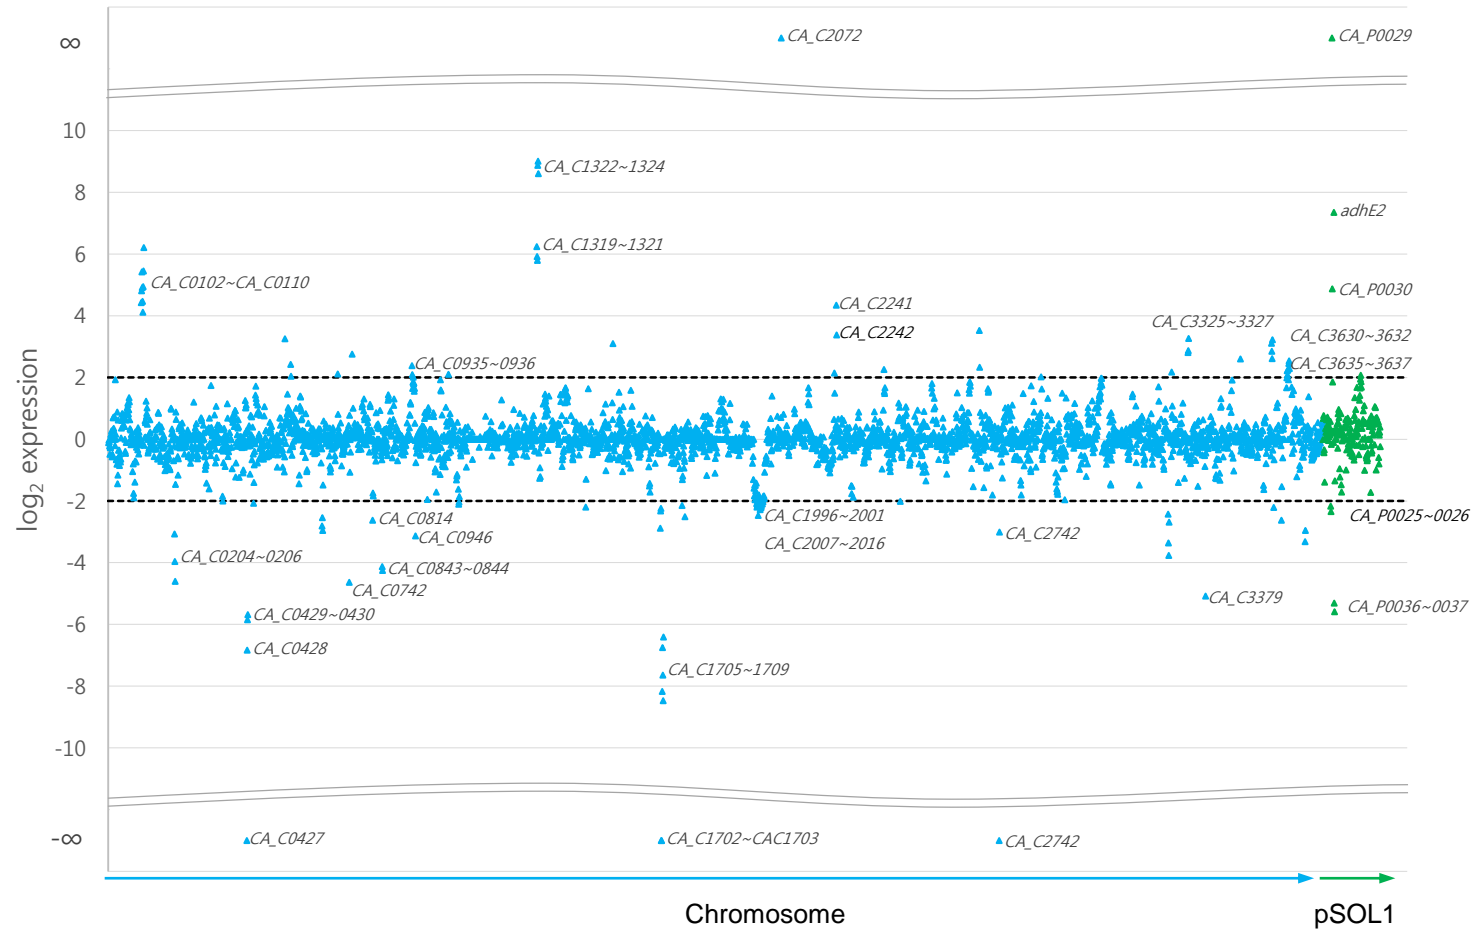

**Fig. S2. Overview of the transcript levels during solventogenesis versus acidogenesis (A) and alcohologenesis versus acidogenesis (B).** Log expression ratios of solventogenesis to acidogenesis (B) and alcohologenesis to acidogenesis are shown. All genes with log values (as logarithms to the basis of 2) higher than 2 ( $\geq 4.0$ -fold increased expression) are significantly induced under solventogenesis (A) and alcohologenesis (B), and genes with a negative log of less than -2 ( $\geq 4.0$ -fold decreased expression) were significantly induced in acidogenesis. According to this definition, all genes between the dashed lines were expected to be not significantly influenced.
