# Supplementary material for: A Quantitative System-Scale Characterization of the Metabolism of Clostridium acetobutylicum
Source: PubMed Central journal article supplement — mBio. 2015 Nov 24;6(6):e01808-15. doi: 10.1128/mBio.01808-15 (PMC4669385; doi:10.1128/mbio.01808-15), 2015-11-24
Supplement: mbo006152564sf3.pdf [file mbo006152564sf3.pdf]

**A**

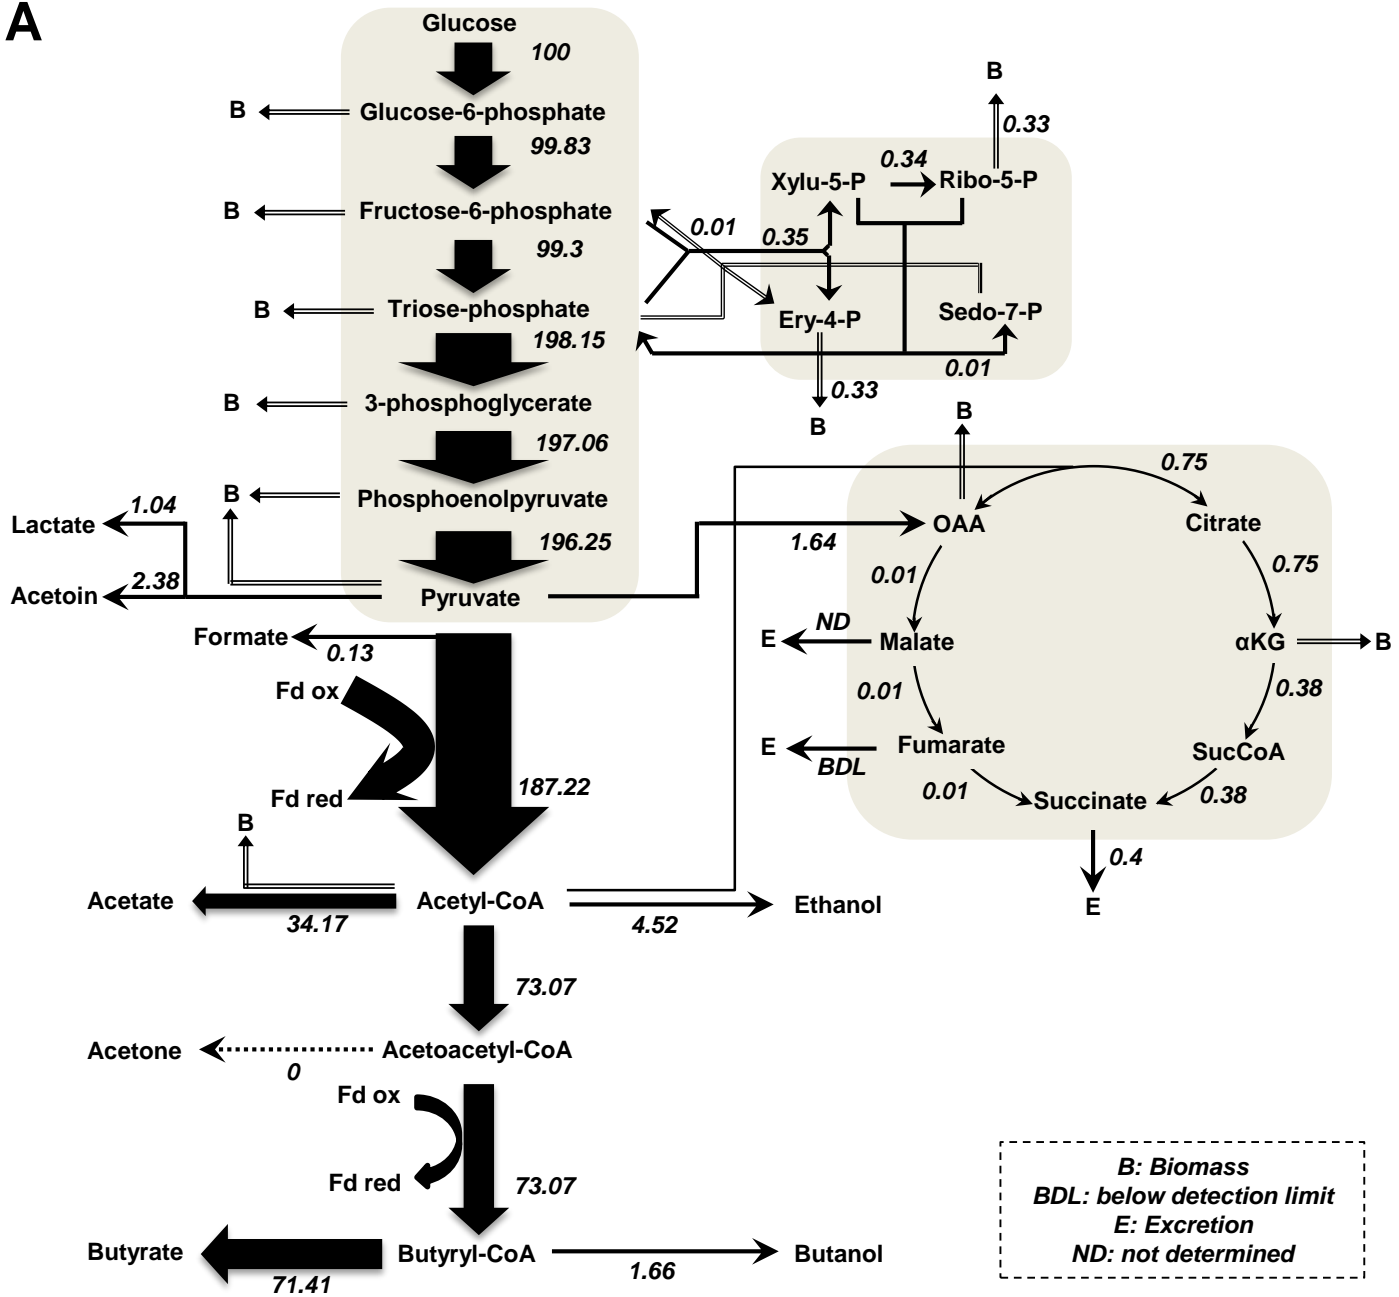

**Fig. S3. Metabolic flux map of *C. acetobutylicum* in acidogenesis (A), solventogenesis (B), alcohologenesis (C).** All values are normalized to flux of initial carbon source (mmol/gDCW/h). Glucose flux normalized as 100 in the acidogenesis and solventogenesis, and sum of glucose and half of glycerol normalized as 100 in alcohologenesis.

**B**

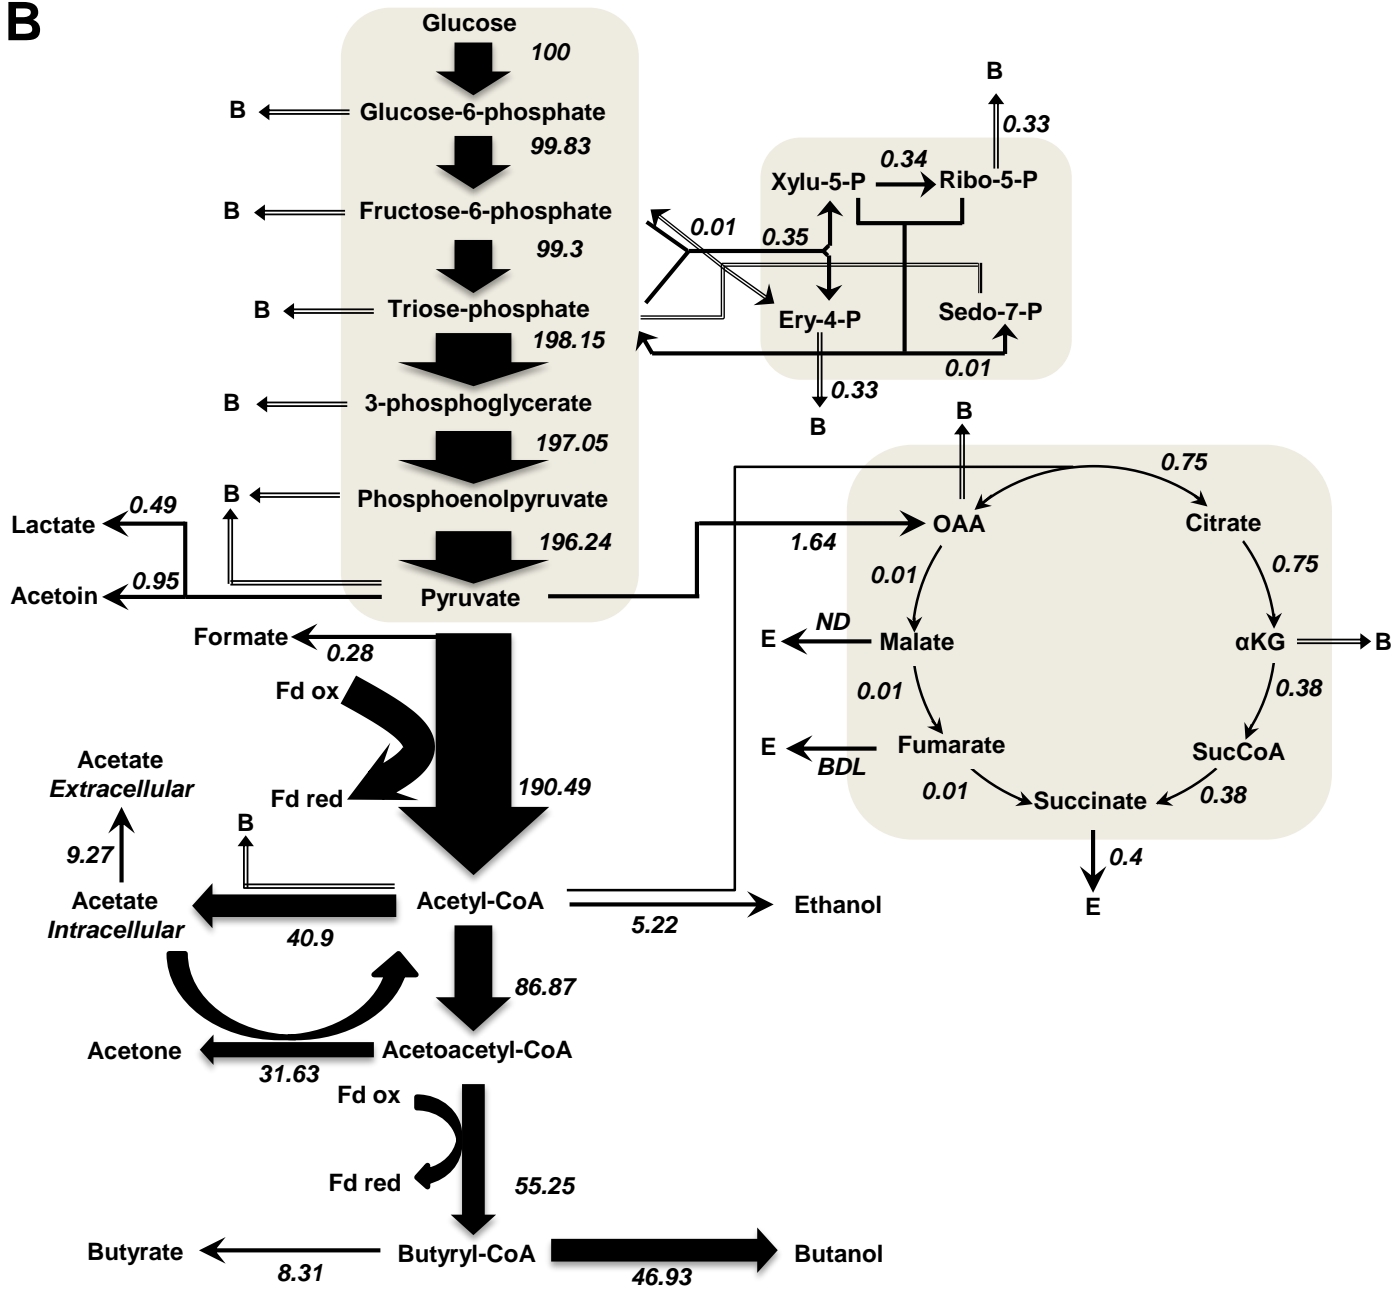

**Fig. S3. Metabolic flux map of *C. acetobutylicum* in acidogenesis (A), solventogenesis (B), alcohologenesis (C).** All values are normalized to flux of initial carbon source (mmol/gDCW/h). Glucose flux normalized as 100 in the acidogenesis and solventogenesis, and sum of glucose and half of glycerol normalized as 100 in alcohologenesis.

C

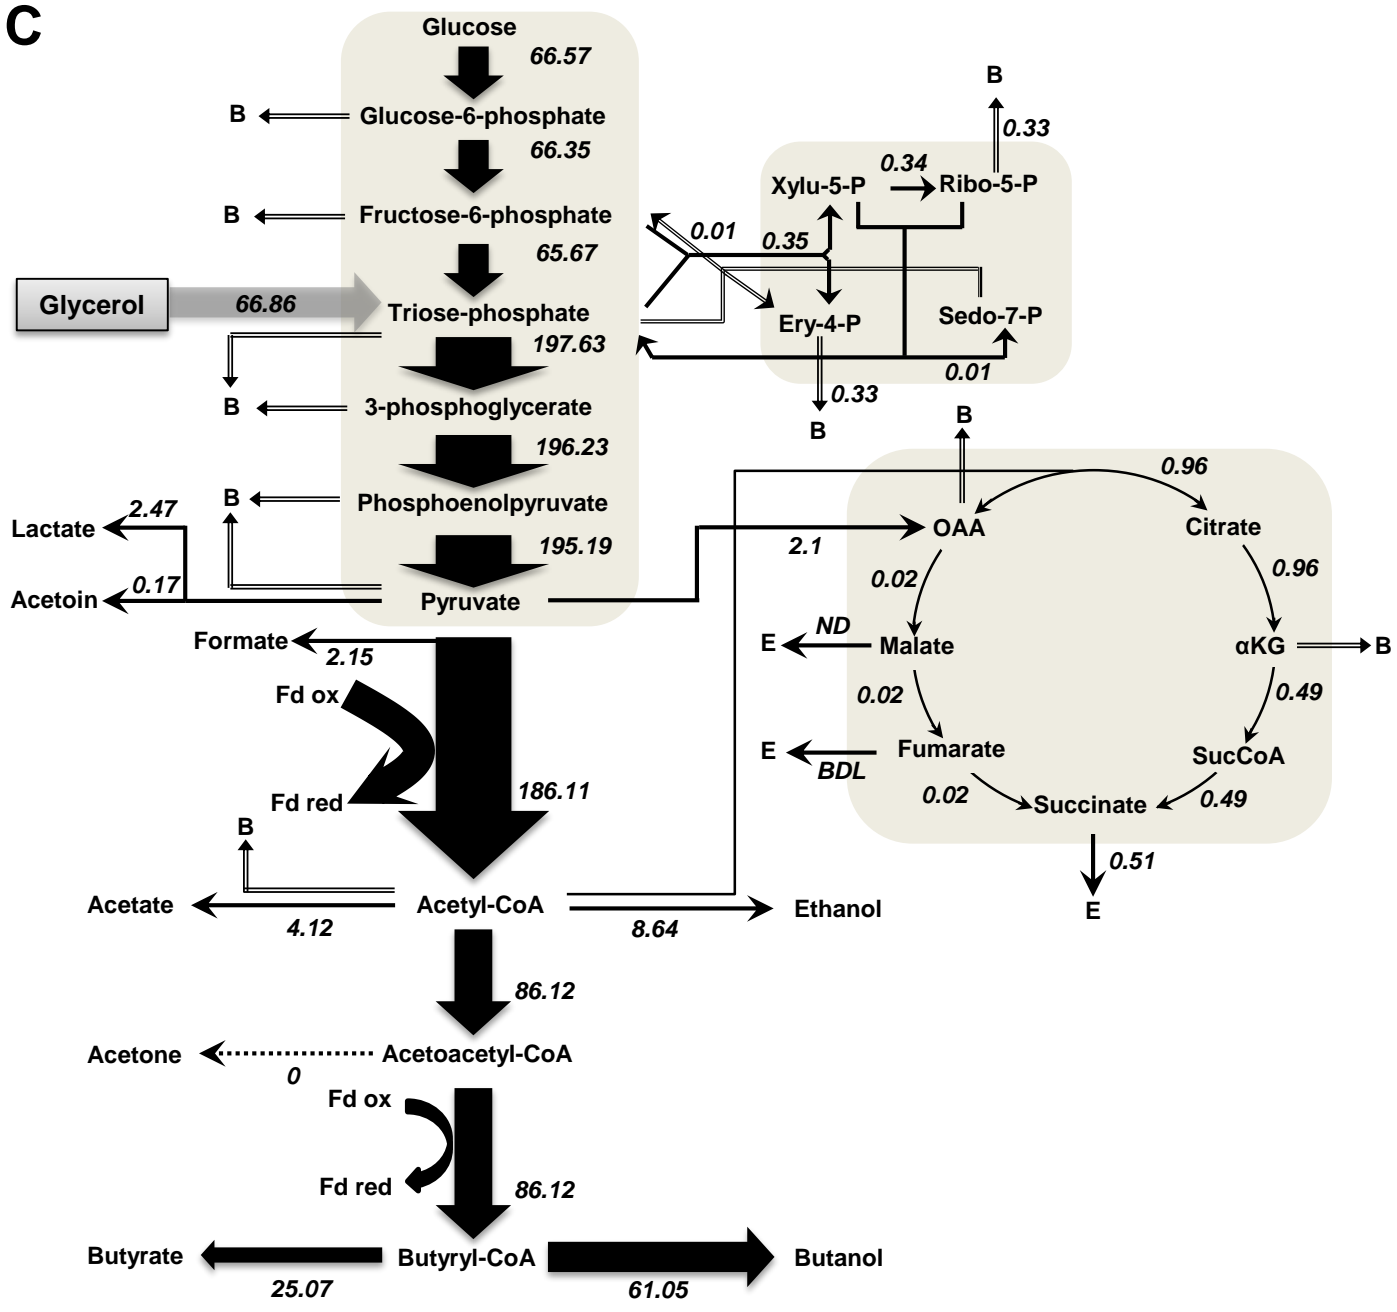

**Fig. S3. Metabolic flux map of *C. acetobutylicum* in acidogenesis (A), solventogenesis (B), alcohologenesis (C).** All values are normalized to flux of initial carbon source (mmol/gDCW/h). Glucose flux normalized as 100 in the acidogenesis and solventogenesis, and sum of glucose and half of glycerol normalized as 100 in alcohologenesis.
