# Supplementary material for: A Quantitative System-Scale Characterization of the Metabolism of Clostridium acetobutylicum
Source: PubMed Central journal article supplement — mBio. 2015 Nov 24;6(6):e01808-15. doi: 10.1128/mBio.01808-15 (PMC4669385; doi:10.1128/mbio.01808-15), 2015-11-24
Supplement: mbo006152564sf4.pdf [file mbo006152564sf4.pdf]

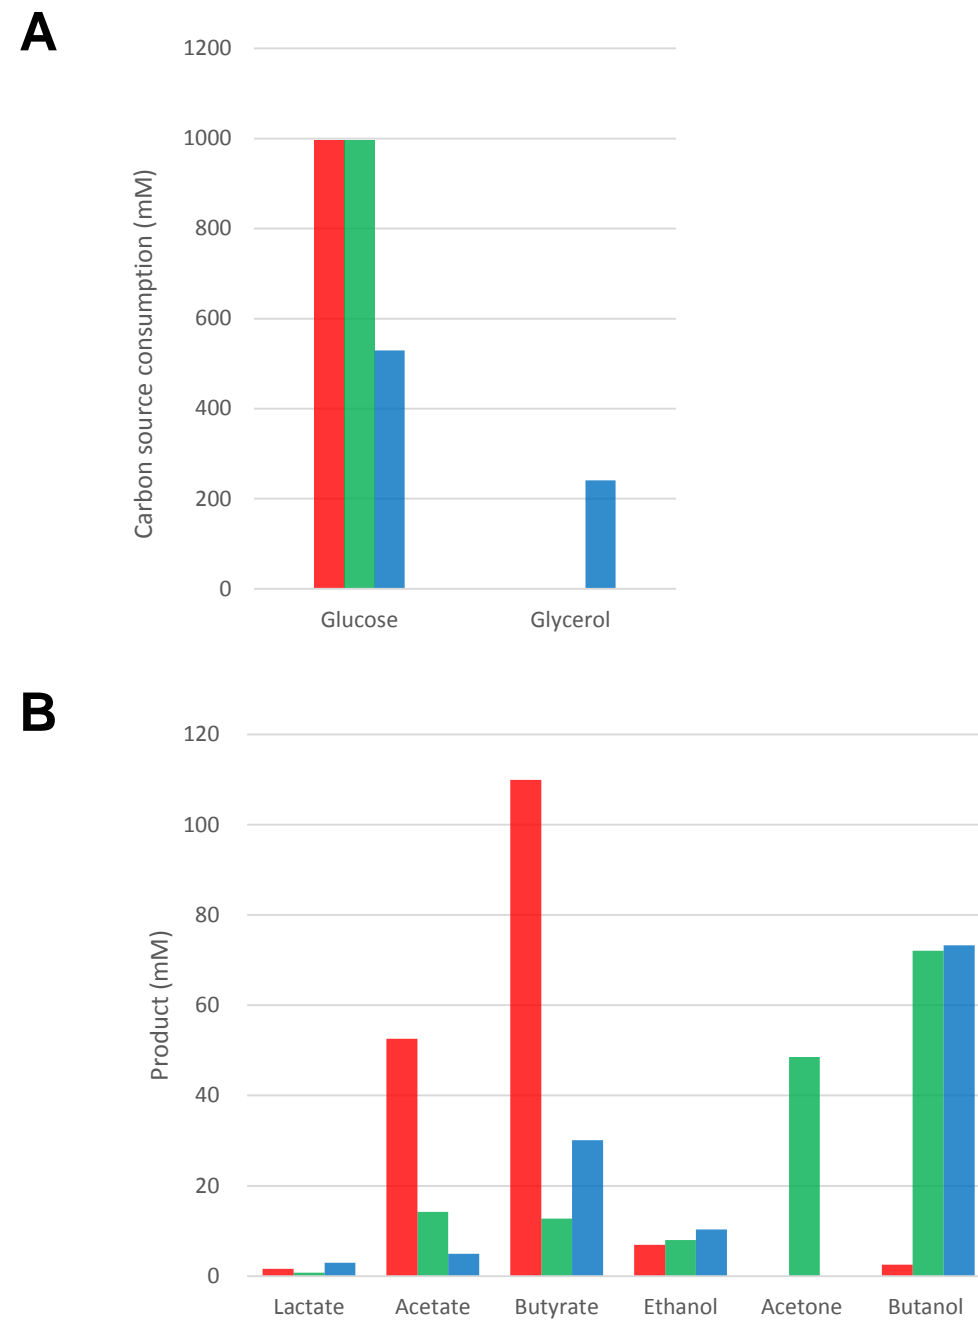

**Fig. S4. Carbon source consumption and product profiles of *C. acetobutylicum*.**

(A) Carbon source consumption. (B) Product profiles. Each histogram indicates different metabolic states: red (acidogenesis, corresponding DCW values of 1.34 g/l), green (solventogenesis, corresponding DCW values of 1.57 g/l), and blue (alcohologenesis, corresponding DCW values of 0.86 g/l).
